# Supplementary material for: Trust and health: testing the reverse causality hypothesis
Source: HighWire-hosted journal article supplement (doi:10.1136/jech-2015-205822), 2015-11-06
Supplement: jech-2015-205822supp.pdf [file jech-2015-205822supp.pdf]

## **Appendix**

To determine social participation levels, respondents were asked if they were *active* members of any local group or organisation listed below:

Political party, trade union, environmental group, parents'/school association, tenants'/residents' group or neighbourhood watch, church organisation, voluntary service group, pensioners group/organisation, social club/working men's club, sports club or Women's Institute.

The six occupation categories, as per the Registrar General's Social Classification of occupations are: i) Professional, ii) Managerial/Technical, iii) Skilled (non-manual), iiiib) Skilled (manual), iv) Partly Skilled and v) Unskilled.
